# Supplementary material for: Balancing “on” and “off” response of hydroxyl groups to a nanozyme-catalyzing system for the construction of an ultra-sensitive and selective “signal-on” detection platform for dopamine
Source: Royal Society of Chemistry journal article supplement (doi:10.1039/d3ra02946h), 2023-01-01
Supplement: d3ra02946h1.pdf [file d3ra02946h1.pdf]

## Supplementary Information

### **Balancing “on” and “off” response of hydroxy groups to nanozyme catalyzing system to construct ultrasensitive and selective “signal-on” detection platform for dopamine**

Hongmei Lan, <sup>a‡</sup> Gaoya Li, <sup>a‡</sup> Guo Chen, <sup>a b</sup> Mengyao Ding, <sup>a</sup> Shuangling Xiao, <sup>a</sup>  
Jianglin Xiang, <sup>a</sup> Xingwu Duan, <sup>a</sup> Haiyan Cao, <sup>a</sup> Wenbing Shi <sup>a</sup> and Wenfei Dong <sup>\*a</sup>

<sup>a</sup> *Key Laboratory of Chongqing Inorganic Special Functional Materials, College of Chemistry and Chemical Engineering, Yangtze Normal University, Chongqing 408100, PR China.*

<sup>b</sup> *College of Chemistry and Chemical Engineering, Central South University, Changsha, Hunan 410083, PR China.*

\* Corresponding authors:

E-mail: [dongwenfei@yznu.edu.cn](mailto:dongwenfei@yznu.edu.cn)

‡ These authors contribute to this work equally.

#### **Table of Contents:**

Figs. S1-9

Table S1

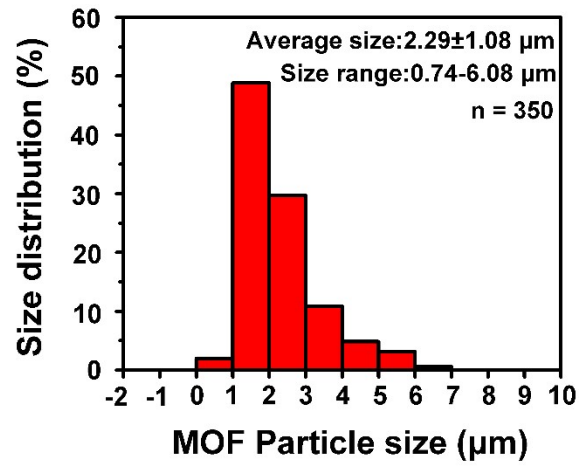

**Fig. S1** The size distribution of MIL-101(Fe) calculated from Fig. 1A.

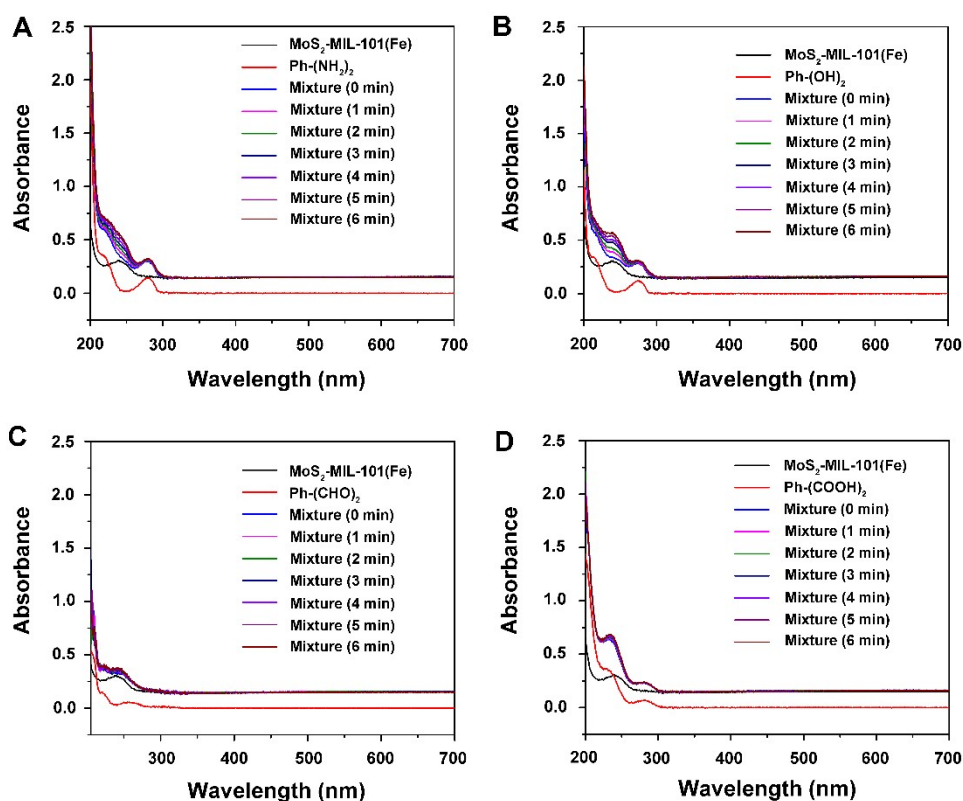

**Fig. S2** (A) UV-Vis spectra of MoS<sub>2</sub>-MIL-101(Fe), Ph-(NH<sub>2</sub>)<sub>2</sub>, and the mixture of MoS<sub>2</sub>-MIL-101(Fe) and Ph-(NH<sub>2</sub>)<sub>2</sub> after mixing for 0, 1, 2, 3, 4, 5, 6 min; (B) UV-Vis spectra of MoS<sub>2</sub>-MIL-101(Fe), Ph-(OH)<sub>2</sub>, and the mixture of MoS<sub>2</sub>-MIL-101(Fe) and Ph-(OH)<sub>2</sub> after mixing for 0, 1, 2, 3, 4, 5, 6 min; (C) UV-Vis spectra of MoS<sub>2</sub>-MIL-101(Fe), Ph-(CHO)<sub>2</sub>, and the mixture of MoS<sub>2</sub>-MIL-101(Fe) and Ph-(CHO)<sub>2</sub> after mixing for 0, 1, 2, 3, 4, 5, 6 min; (D) UV-Vis spectra of MoS<sub>2</sub>-MIL-101(Fe), Ph-(COOH)<sub>2</sub>, and the mixture of MoS<sub>2</sub>-MIL-101(Fe) and Ph-(COOH)<sub>2</sub> after mixing for 0, 1, 2, 3, 4, 5, 6 min. Condition: 50 mg L<sup>-1</sup> of MoS<sub>2</sub>-MIL-101(Fe), 50 μM of Ph-(NH<sub>2</sub>)<sub>2</sub>, Ph-(OH)<sub>2</sub>, Ph-(CHO)<sub>2</sub>, and Ph-(COOH)<sub>2</sub>.

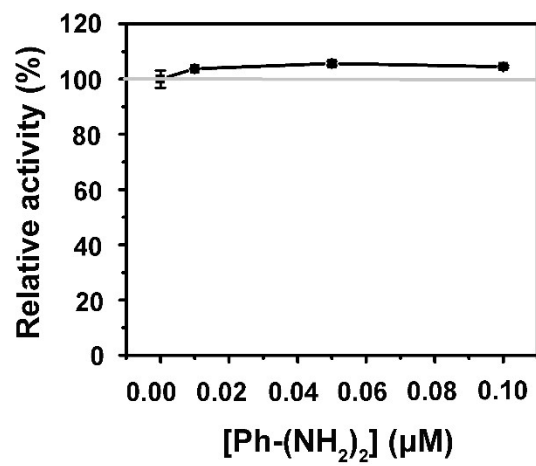

**Fig. S3** The response of MoS<sub>2</sub>-MIL-101(Fe) catalyzed H<sub>2</sub>O<sub>2</sub>-TMB system to Ph-(NH<sub>2</sub>)<sub>2</sub> in the concentration of 0, 0.01, 0.05, 0.10 μM.

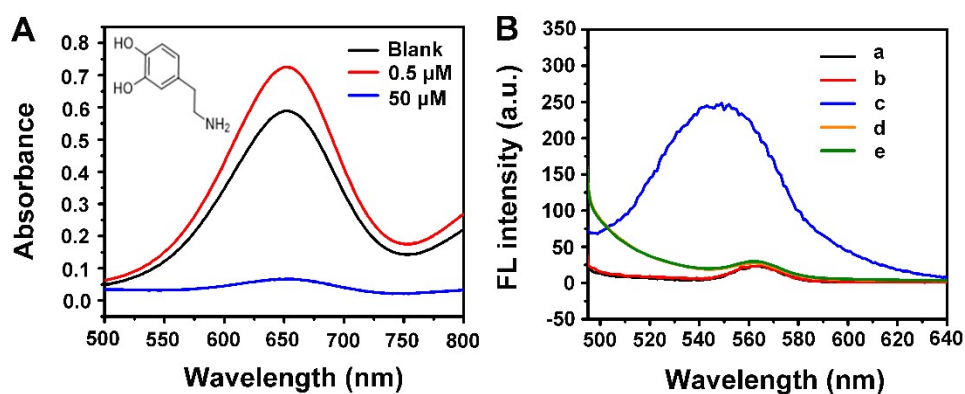

**Fig. S4** (A) UV-Vis spectra of MoS<sub>2</sub>-MIL-101(Fe) catalyzed H<sub>2</sub>O<sub>2</sub>-TMB system in the presence or absence of DA with 0.5 μM and 50 μM. (B) The fluorescence spectra of different systems (a. MoS<sub>2</sub>-MIL-101(Fe)+H<sub>2</sub>O<sub>2</sub>; b. MoS<sub>2</sub>-MIL-101(Fe)+H<sub>2</sub>O<sub>2</sub>+DA (0.5 μM); c. MoS<sub>2</sub>-MIL-101(Fe)+H<sub>2</sub>O<sub>2</sub>+DA (50 μM); d. MoS<sub>2</sub>-MIL-101(Fe)+H<sub>2</sub>O<sub>2</sub>+DA (0.5 μM)+TMB; e. MoS<sub>2</sub>-MIL-101(Fe)+H<sub>2</sub>O<sub>2</sub>+DA (50 μM)+TMB. Buffer: 0.2 M NaAc-HAc solution (pH 4.0); H<sub>2</sub>O<sub>2</sub> concentration: 0.06 mM; TMB concentration: 0.1 mM; MoS<sub>2</sub>-MIL-101(Fe) concentration: 5 mg/L; Reaction time: 15 min; Excitation wavelength 475 nm.

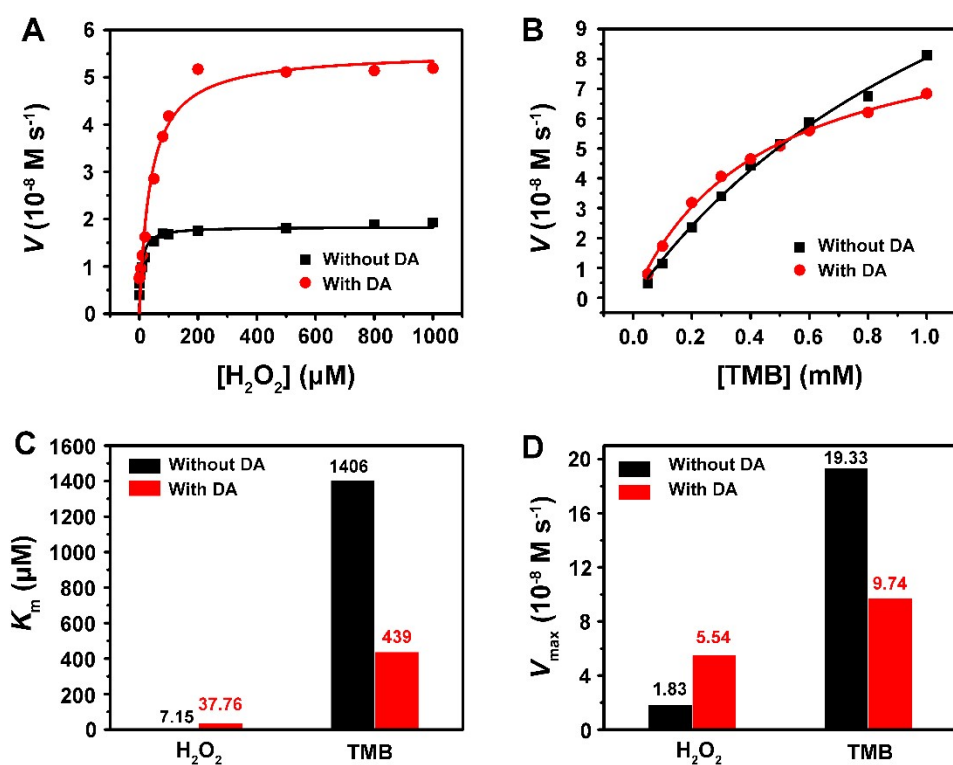

**Fig. S5** (A) The kinetic curve of MoS<sub>2</sub>-MIL-101(Fe)+H<sub>2</sub>O<sub>2</sub>+TMB system in the presence or absence of 0.5 μM DA with the change of H<sub>2</sub>O<sub>2</sub> concentration and a fixed TMB concentration of 0.10 mM; (B) The kinetic curve of MoS<sub>2</sub>-MIL-101(Fe)+H<sub>2</sub>O<sub>2</sub>+TMB system in the presence or absence of 0.5 μM DA with the change of TMB concentration and a fixed H<sub>2</sub>O<sub>2</sub> concentration of 0.06 mM; (C) The Michaelis constant  $K_m$  and (D) the maximum reaction velocity  $V_{max}$  obtained from the kinetic curves.

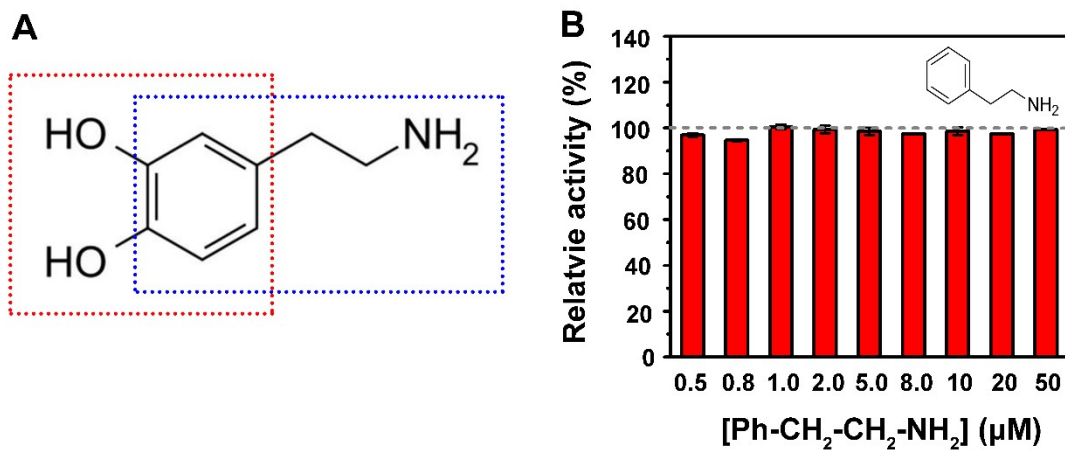

**Fig. S6** (A) The molecular formula of dopamine; (B) The effect of Ph-CH<sub>2</sub>-CH<sub>2</sub>-NH<sub>2</sub> with the concentration range of 0.5 μM—50 μM to MoS<sub>2</sub>-MIL-101(Fe) catalyzed H<sub>2</sub>O<sub>2</sub>-TMB system.

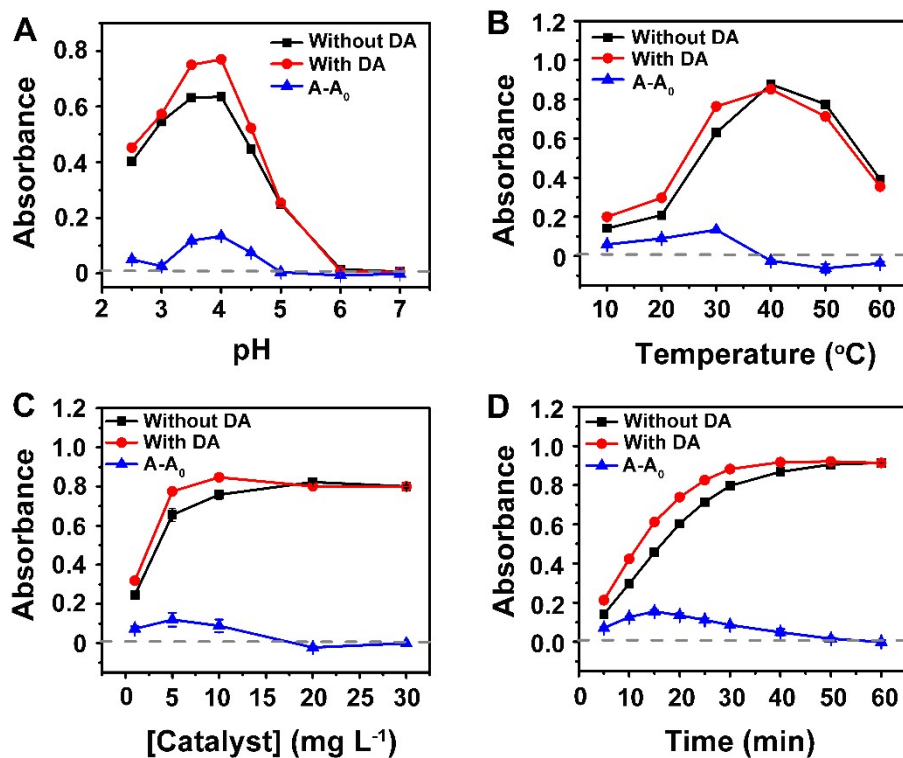

**Fig. S7** The change of the absorbance of MoS<sub>2</sub>-MIL-101(Fe)-H<sub>2</sub>O<sub>2</sub>-TMB system in the absence and presence of 0.5 μM DA with (A) pH change, (B) temperature change, (C) catalyst concentration change and (D) reaction time change.



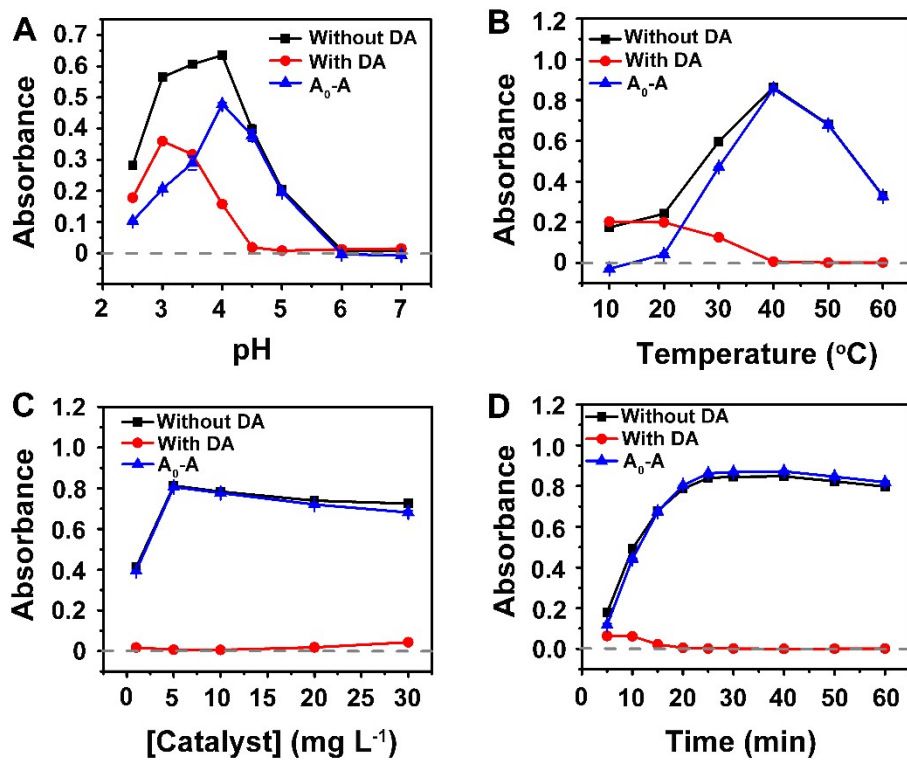

**Fig. S8** The change of the absorbance of MoS<sub>2</sub>-MIL-101(Fe)-H<sub>2</sub>O<sub>2</sub>-TMB system in the absence and presence of 50 μM DA with (A) pH change, (B) temperature change, (C) catalyst concentration change and (D) reaction time change.

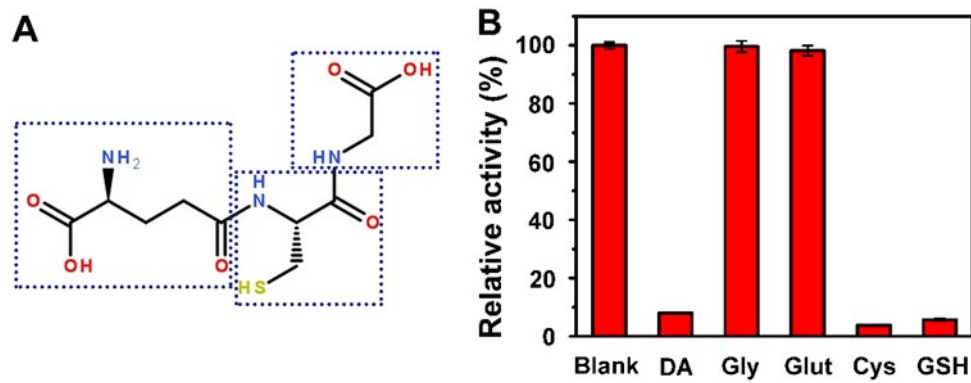

**Fig. S9** (A) The molecular formula of GSH; (B) The absorbance response of the MoS<sub>2</sub>-MIL-101(Fe)-H<sub>2</sub>O<sub>2</sub>-TMB system to dopamine (DA), glycine (Gly), glutamic acid (Glut), cysteine (Cys) and glutathione (GSH) with the concentration of 50  $\mu$ M.

**Table S1** Results for the determination of DA in dopamine hydrochloride injection (n=3).

| No. | Labeled (M) | Detected (M) | RSD (%) |
|-----|-------------|--------------|---------|
| 1   | 0.210       | 0.214±0.009  | 4.3     |
| 2   | 0.053       | 0.048±0.002  | 4.6     |
